# Supplementary material
Source: PubMed Central journal article supplement (PMC3992643)
Supplement: 1320950111_pnas.201320950SI.pdf [file 1320950111_pnas.201320950SI.pdf]

# Supporting Information

Incardona et al. 10.1073/pnas.1320950111

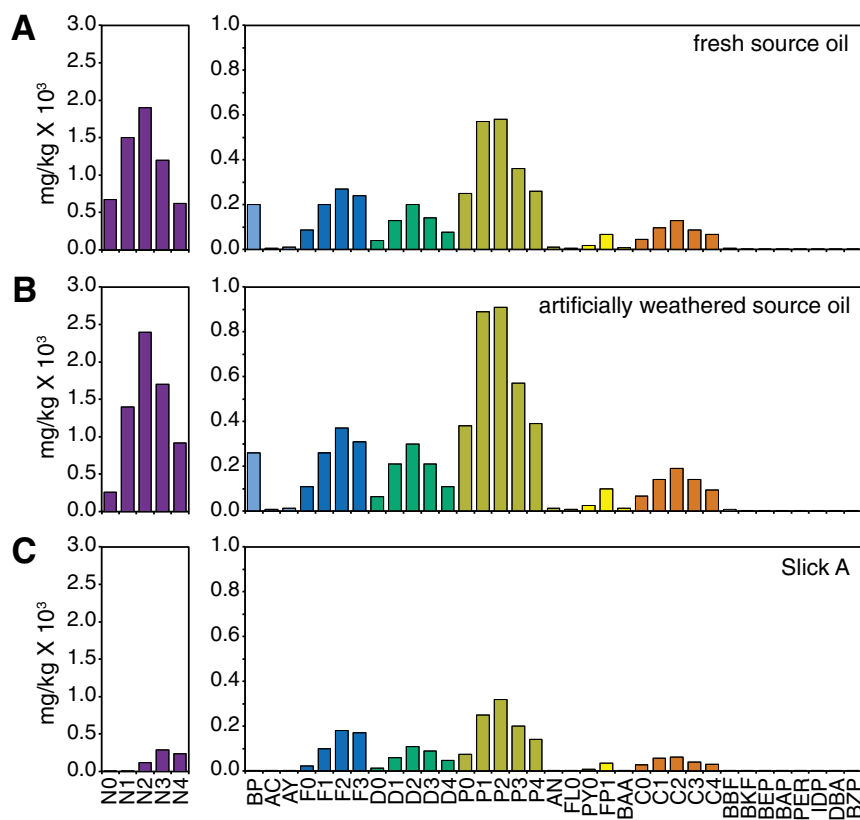

**Fig. S1.** Polycyclic aromatic hydrocarbon (PAH) concentrations (milligrams per kilogram whole oil) for the MC252 oil samples used in pelagic fish early life stage toxicity tests. (A) Fresh, unweathered source oil. (B) Artificially weathered (AW) source oil. (C) Slick A, a field sample collected from skimmers working to remove surface oil during the active spill phase. Abbreviations for PAHs are listed in Table S1. Focal compounds are naphthalenes (N0–N4), fluorenes (F0–F3), dibenzothiophenes (D0–D4), phenanthrenes (P0–P4), and chrysenes (C0–C4).

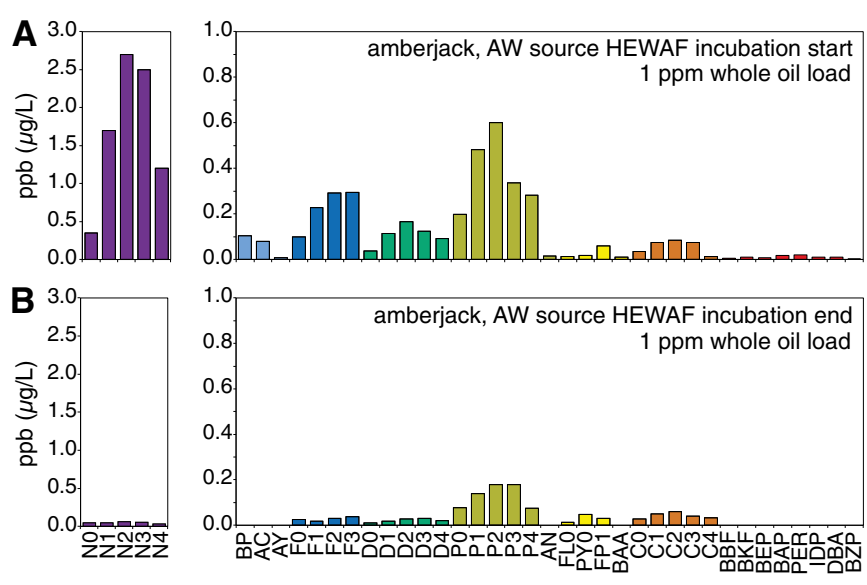

**Fig. S2.** Measured PAHs in high-energy water-accommodated fractions (HEWAFs) are shown for the highest exposure concentration at the start (A) and end (B) of amberjack exposure to artificially weathered source oil. Complete datasets for all dilutions are provided as Dataset S1. Detailed abbreviations for PAHs are listed in Table S1; naphthalenes (N0–N4), fluorenes (F0–F3), dibenzothiophenes (D0–D4), phenanthrenes (P0–P4), and chrysenes (C0–C4).

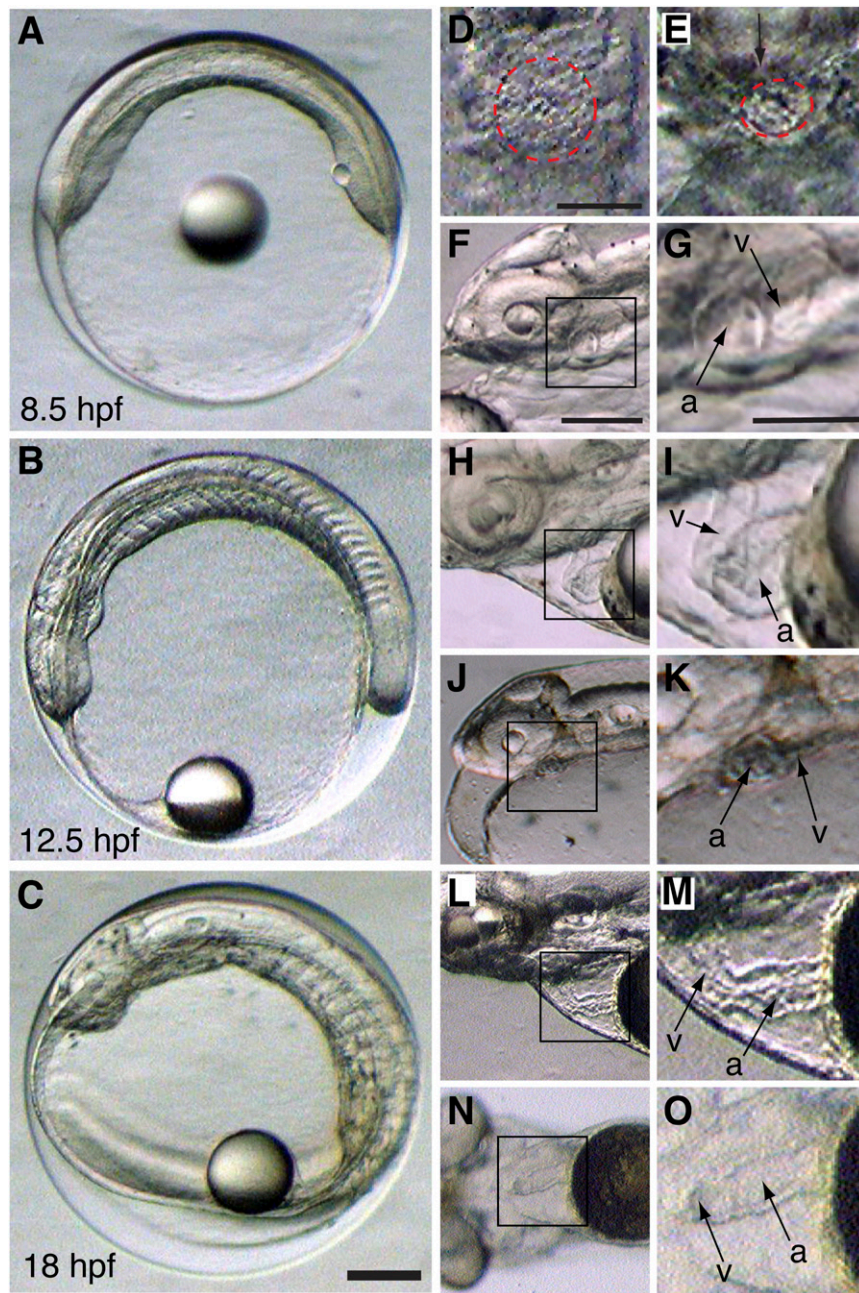

**Fig. S3.** Normal cardiac development in tunas and amberjack. Control yellowfin tuna embryos at (A) 8.5 h postfertilization (hpf) during early segmentation before visible cardiac rudiment, (B) 12.5 hpf during late segmentation when the cardiac cone was visible, and (C) 18 hpf at the free-tail stage approaching hatch when a regular heart beat was already established. (D and E) Ventral views of the cardiac cone (outlined by red dashed lines) in yellowfin tuna at 12.5 hpf (D) and amberjack at ~14 hpf (E) when the cardiac cone was rotated slightly to the left of the midline (arrow indicates midline of the forebrain). (F–O) Laterally rotated hearts in newly hatched larvae and posterior extension after hatch in amberjack (F–I) and yellowfin tuna (J–O). Middle series shows lower magnification views of the pericardial area with *Insets* indicating the hearts, which are enlarged in the paired series to the right; atrium (a) and ventricle (v). (F and G) Amberjack immediately posthatch and (H and I) 15 h posthatch (hph). (J and K) Yellowfin tuna immediately posthatch and 16 hph (L, M, lateral views; N, O, ventral views). [Scale bars, 200  $\mu$ m (A–C, F, H, J, L, N) and 100  $\mu$ m (D, E, G, I, K, M, O).]



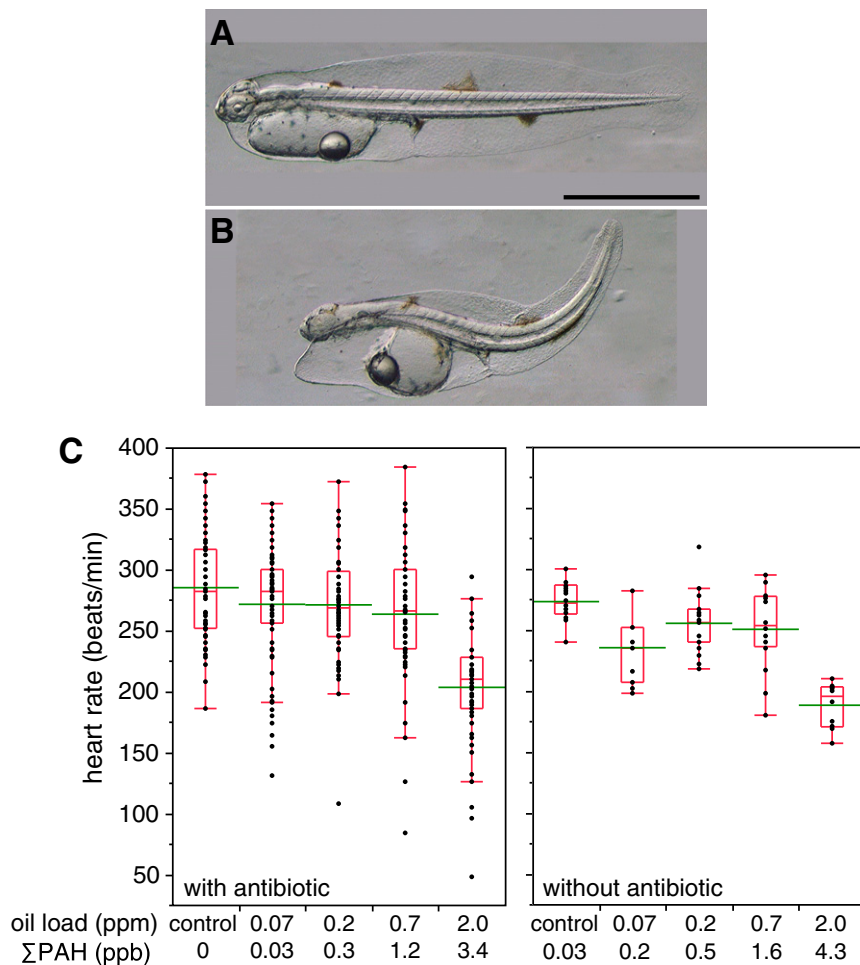

**Fig. 55.** MC252 oil exposure resulted in identical defects with or without the inclusion of a broad-spectrum antibiotic. Gross morphology of control yellowfin tuna larva (A) and exposed to slick A HEWAF with 4.6  $\mu\text{g/L}$   $\Sigma\text{PAH}$  (B), both cultured in the presence of 10 mg/L oxytetracycline. (Scale bar, 1 mm.) (C) Heart-rate data for both yellowfin tuna exposures without antibiotic (Left) and with 10 mg/L oxytetracycline (Right). All datapoints are shown for each exposure concentration. The x-axis labels indicate nominal oil load at top (mg/L) and measured  $\Sigma\text{PAH}$ s at bottom ( $\mu\text{g/L}$ ). Box-and-whisker plots encompass the distribution of individual datapoints. The green line indicates the mean, the ends of the boxes show the 25th and 75th quartiles, and ends of the whiskers show the upper and lower quartiles  $\pm$  (1.5 $\times$  interquartile range). Datapoints outside the whiskers are potential outliers. Data from the no antibiotic treatment represent six replicates; the treatment with oxytetracycline is a single replicate. Data from tests with and without oxytetracycline were analyzed both separately and together, with nearly identical ANOVA and post hoc results.

**Table S1. Measured PAHs used to calculate  $\Sigma$ PAH**

| 40-analyte list*               | 50-analyte list           |
|--------------------------------|---------------------------|
| Naphthalene (N0)               | Naphthalene               |
| C1-Naphthalenes (N1)           | C1-Naphthalenes           |
| C2-Naphthalenes (N2)           | C2-Naphthalenes           |
| C3-Naphthalenes (N3)           | C3-Naphthalenes           |
| C4-Naphthalenes (N4)           | C4-Naphthalenes           |
| Biphenyl (BP)                  | Biphenyl                  |
| Acenaphthylene (AY)            | Acenaphthylene            |
| Acenaphthene (AC)              | Acenaphthene              |
| Fluorene (F0)                  | Fluorene                  |
| C1-Fluorenes (F1)              | C1-Fluorenes              |
| C2-Fluorenes (F2)              | C2-Fluorenes              |
| C3-Fluorenes (F3)              | C3-Fluorenes              |
| Anthracene (AN)                | Anthracene                |
| Phenanthrene (P0)              | Phenanthrene              |
| C1-Phenanthrenes (P1)          | C1-Phenanthrenes          |
| C2-Phenanthrenes (P2)          | C2-Phenanthrenes          |
| C3-Phenanthrenes (P3)          | C3-Phenanthrenes          |
| C4-Phenanthrenes (P4)          | C4-Phenanthrenes          |
| Dibenzothiophene (D0)          | Retene                    |
| C1-Dibenzothiophenes (D1)      | Dibenzothiophene          |
| C2-Dibenzothiophenes (D2)      | C1-Dibenzothiophenes      |
| C3-Dibenzothiophenes (D3)      | C2-Dibenzothiophenes      |
| C4-Dibenzothiophenes (D4)      | C3-Dibenzothiophenes      |
| Fluoranthene (FL)              | C4-Dibenzothiophenes      |
| Pyrene (PY)                    | Fluoranthene              |
| C1-Fluoranthenes/Pyrenes (FP1) | Pyrene                    |
| Benz(a)anthracene (BAA)        | C1-Fluoranthenes/Pyrenes  |
| Chrysene+Triphenylene (C0)     | C2-Fluoranthenes/Pyrenes  |
| C1-Chrysenes (C1)              | C3-Fluoranthenes/Pyrenes  |
| C2-Chrysenes (C2)              | C4-Fluoranthenes/Pyrenes  |
| C3-Chrysenes (C3)              | Naphthobenzothiophene     |
| C4-Chrysenes (C4)              | C1-Naphthobenzothiophenes |
| Benzo(b)fluoranthene (BBF)     | C2-Naphthobenzothiophenes |
| Benzo(j+k)fluoranthene (BKF)   | C3-Naphthobenzothiophenes |
| Benzo(e)pyrene (BEP)           | C4-Naphthobenzothiophenes |
| Benzo(a)pyrene (BAP)           | Benz(a)anthracene         |
| Perylene (PER)                 | Chrysene+Triphenylene     |
| Indeno(1,2,3-cd)pyrene (IDP)   | C1-Chrysenes              |
| Dibenz(a,h)anthracene (DBA)    | C2-Chrysenes              |
| Benzo(g,h,i)perylene (BZP)     | C3-Chrysenes              |
|                                | C4-Chrysenes              |
|                                | Benzo(b)fluoranthene      |
|                                | Benzo(j+k)fluoranthene    |
|                                | Benzo(a)fluoranthene      |
|                                | Benzo(e)pyrene            |
|                                | Benzo(a)pyrene            |
|                                | Perylene                  |
|                                | Indeno(1,2,3-cd)pyrene    |
|                                | Dibenz(a,h)anthracene     |
|                                | Benzo(g,h,i)perylene      |

\*The 40-analyte list is used for all  $\Sigma$ PAH reported in the figures and is the conventional list for National Oceanic and Atmospheric Administration publications cited within the text. The 50-analyte list is used for supplemental EC<sub>50</sub> values reported in Tables 1 and 2, for comparison to other ongoing *Deepwater Horizon* Natural Resource Damage Assessment studies.

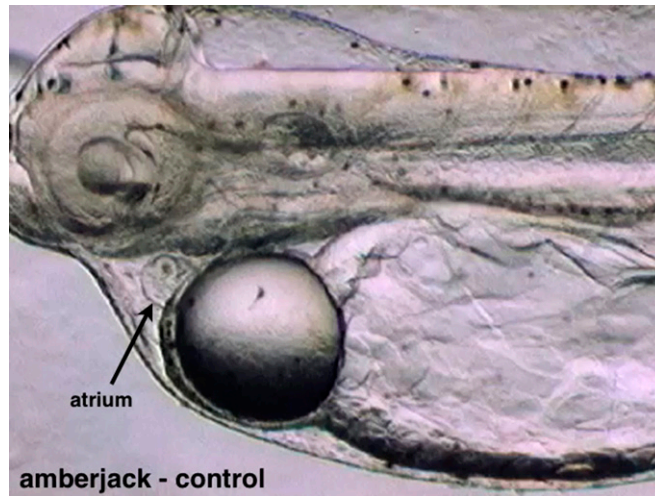

**Movie S1.** Cardiac arrhythmia resulting from MC252 crude oil exposure. The video shows a series of four clips of the beating heart in hatching stage larvae: amberjack (control), amberjack (MC252 crude oil exposed,  $\Sigma$ PAH 13.8  $\mu$ g/L), yellowfin tuna (control), and yellowfin tuna (MC252 crude oil-exposed,  $\Sigma$ PAH 3.4  $\mu$ g/L). The atrium is indicated with an arrow. (Total magnification, 63 $\times$ .) The playback video frame rate was reduced to one-third of the acquisition rate.

[Movie S1](#)

## Other Supporting Information Files

[Dataset S1 \(XLSX\)](#)
